# Supplementary material
Source: publisher figshare collection journal article supplement (https://frontiersin.figshare.com/ndownloader/files/21957438)

*Supplementary Figure 4***Prominence of IL6, IGF, TLR and bioenergetics pathway perturbation in lung tissues of scleroderma patients with pulmonary fibrosis**

**Ludivine Renaud<sup>1</sup>, Willian A. da Silveira<sup>2</sup>, Naoko Takamura<sup>1</sup>, Gary Hardiman<sup>2</sup>, Carol Feghali-Bostwick<sup>1\*</sup>**

<sup>1</sup> Department of Medicine, Medical University of South Carolina, Charleston, SC, USA.

<sup>2</sup> School of Biological Sciences and Institute for Global Food Security, Queens University Belfast, Belfast BT9 5AG, UK.

**\* Correspondence:**

Dr. Carol Feghali-Bostwick  
feghalib@musc.edu

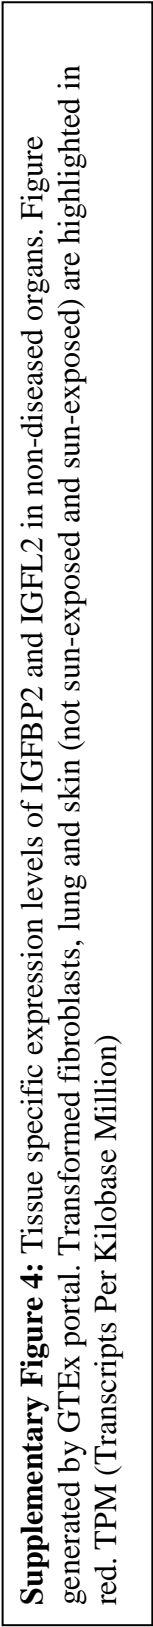

Supplement: Supplementary file [file 21957438]
